# Supplementary material for: Elbow spasticity during passive stretch-reflex: clinical evaluation using a wearable sensor system
Source: Springer Nature journal article supplement (doi:10.1186/1743-0003-10-61), 2013-01-01
Supplement: 12984_2012_476_MOESM2_ESM.pdf [file 12984_2012_476_MOESM2_ESM.pdf]

**a** 73 yr old MS patient—normal tone (MAS=0)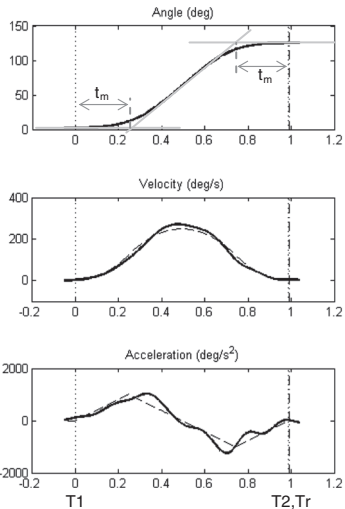**b** 62 yr old ABI patient—moderate tone (MAS=1+)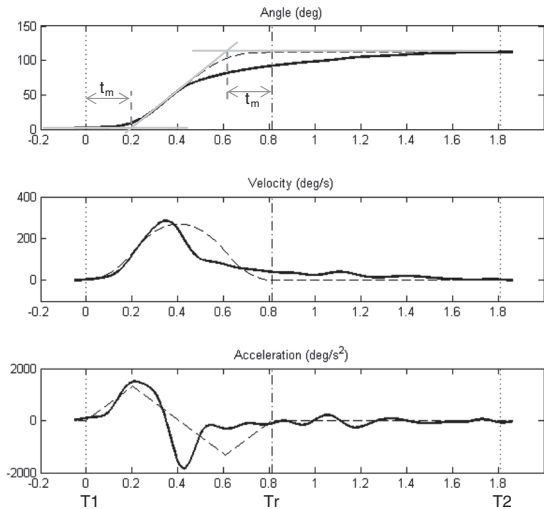

— Kinematic data from BioTone - - - Kinematic reference model
