# Supplementary material for: Elbow spasticity during passive stretch-reflex: clinical evaluation using a wearable sensor system
Source: Springer Nature journal article supplement (doi:10.1186/1743-0003-10-61), 2013-01-01

## 41 yr old ABI patient-high tone (MAS=3)

Angle (deg) - Extension trial

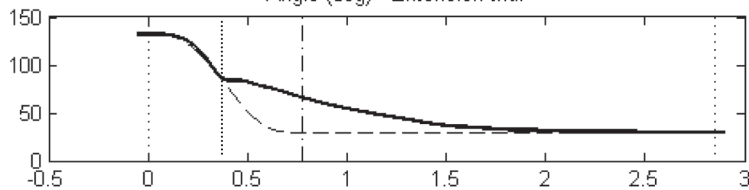 $\Delta\omega$  Velocity difference (deg/s)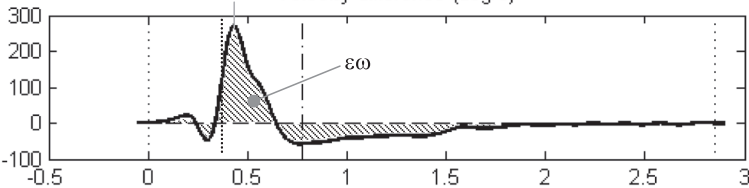 $\Delta\alpha$  Acceleration difference (deg/s<sup>2</sup>)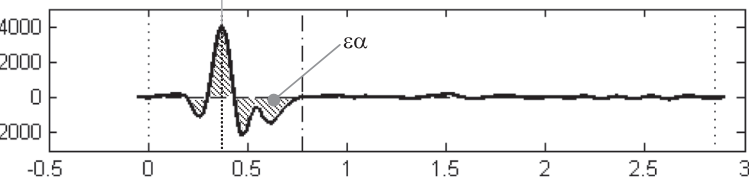

Antagonist EMG - Raw (biased removed)

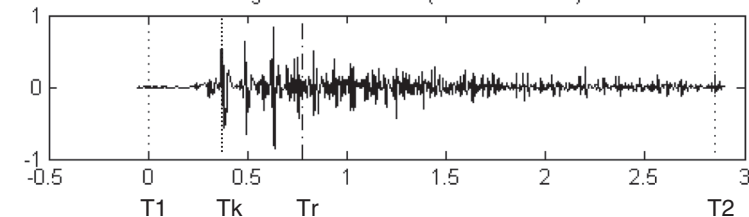

Supplement: 12984_2012_476_MOESM3_ESM.pdf [file 12984_2012_476_MOESM3_ESM.pdf]
