# Supplementary material for: Elbow spasticity during passive stretch-reflex: clinical evaluation using a wearable sensor system
Source: Springer Nature journal article supplement (doi:10.1186/1743-0003-10-61), 2013-01-01

## 41 yr old ABI patient-high tone (MAS=3)

Angle (deg)

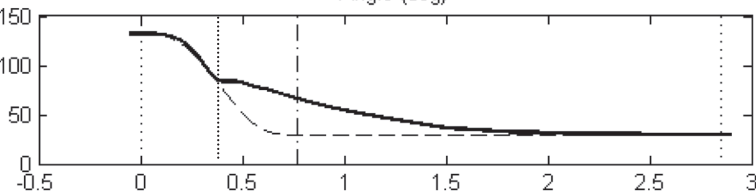

Flexor EMG - Raw (bias removed)

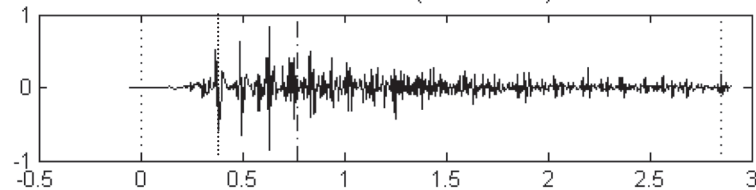

Flexor EMG - Band-pass filtered &amp; rectified

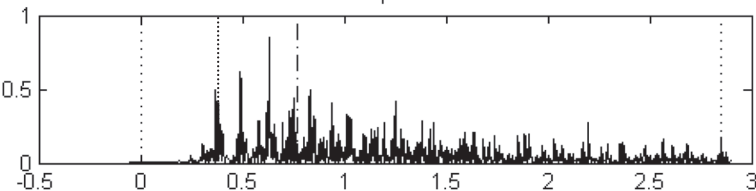

Flexor EMG - Low pass filtered

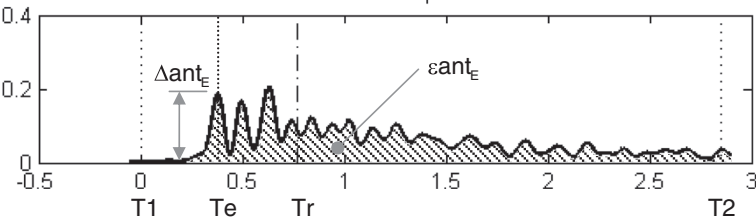

Supplement: 12984_2012_476_MOESM4_ESM.pdf [file 12984_2012_476_MOESM4_ESM.pdf]
