# Supplementary figures and images for: Elbow spasticity during passive stretch-reflex: clinical evaluation using a wearable sensor system
Source: Springer Nature journal article supplement (doi:10.1186/1743-0003-10-61), 2013-01-01

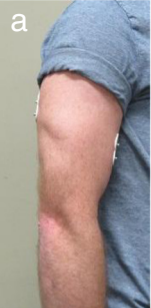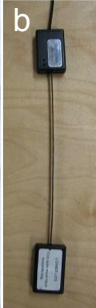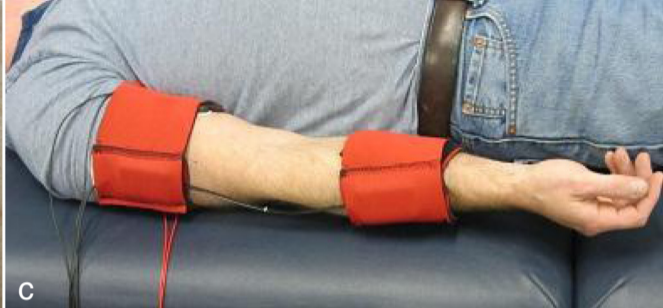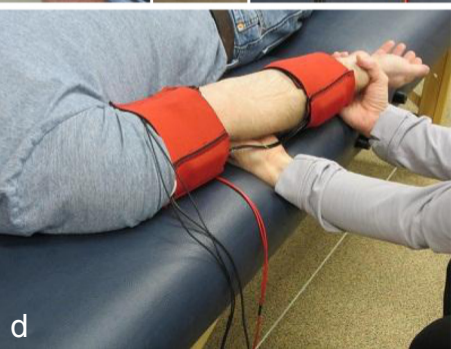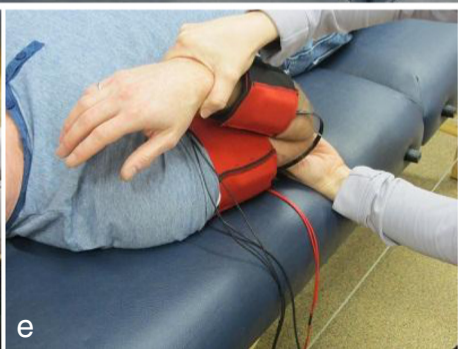

Supplement: 12984_2012_476_MOESM1_ESM.pdf [file 12984_2012_476_MOESM1_ESM.pdf]

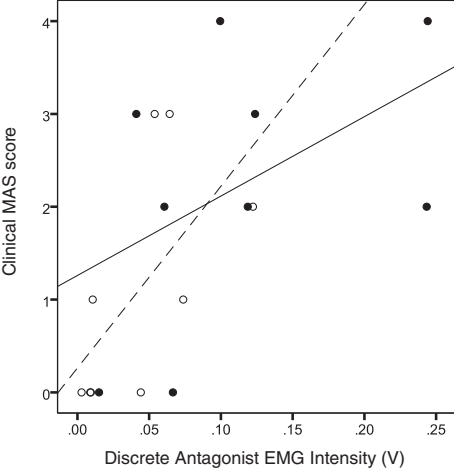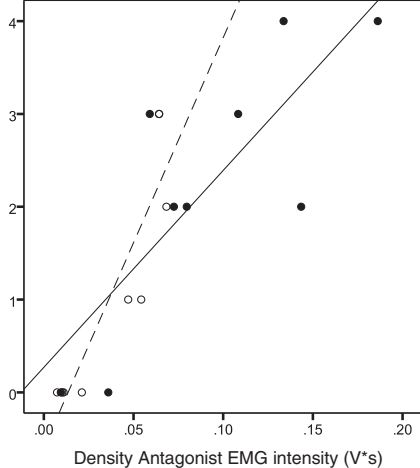

● Flexor muscle score    ○ Extensor muscle score

Supplement: 12984_2012_476_MOESM5_ESM.pdf [file 12984_2012_476_MOESM5_ESM.pdf]
